# Supplementary material
Source: publisher figshare collection journal article supplement (https://acs.figshare.com/ndownloader/files/3804205)
Supplement: Supplementary file 1 [file 3804205]

## Supporting information

### **Cocrystals of Hydrochlorothiazide : Solubility and diffusion/permeability enhancements through drug-coformer interactions.**

Palash Sanphui,<sup>‡</sup> V. Kusum Devi,<sup>†</sup> Deepa Mathew,<sup>†</sup> Nidhi Malviya<sup>†</sup>, Somnath Ganguly<sup>‡,\*</sup> and Gautam R. Desiraju<sup>‡,\*</sup>

### **Index**

**Figure S1.** PXRD comparisons of hydrochlorothiazide cocrystals their calculated X-ray patterns.

**Figure S2.** Synthon differences between two reported forms of hydrochlorothiazide.

**Figure S3.** Hirshfeld 2D finger print plots of the interactions present in HCT and co crystals

**Figure S4.** Plot of cocrystal and coformer solubility in pH 7.4 buffer

**Figure S5.** Plot of Permeability of cocrystal and logD coformer

**Figure S6.** (a) UV absorbance spectra of NIC (b) UV absorbance spectra of HCT+ NIC physical mixture at different time intervals

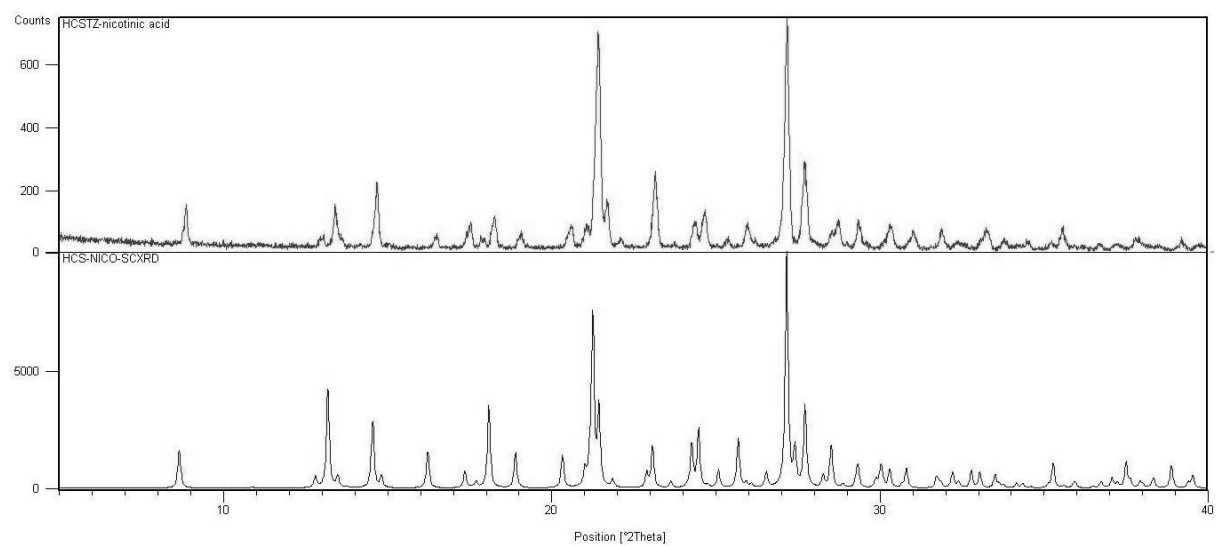

(a) HCT-NIC (1:1)

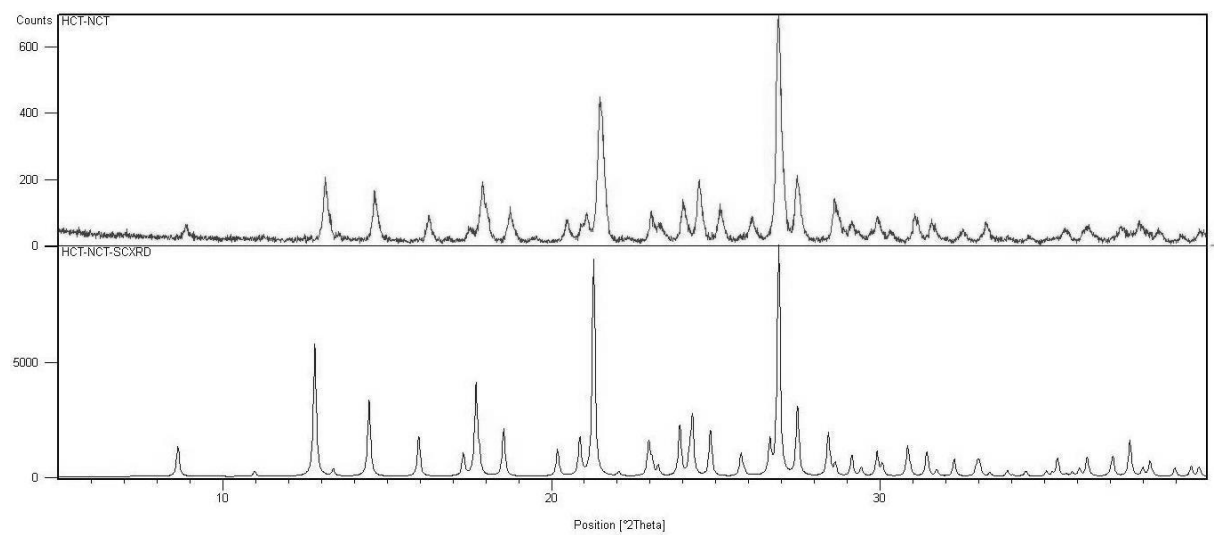

(b) HCT-NCT (1:1)

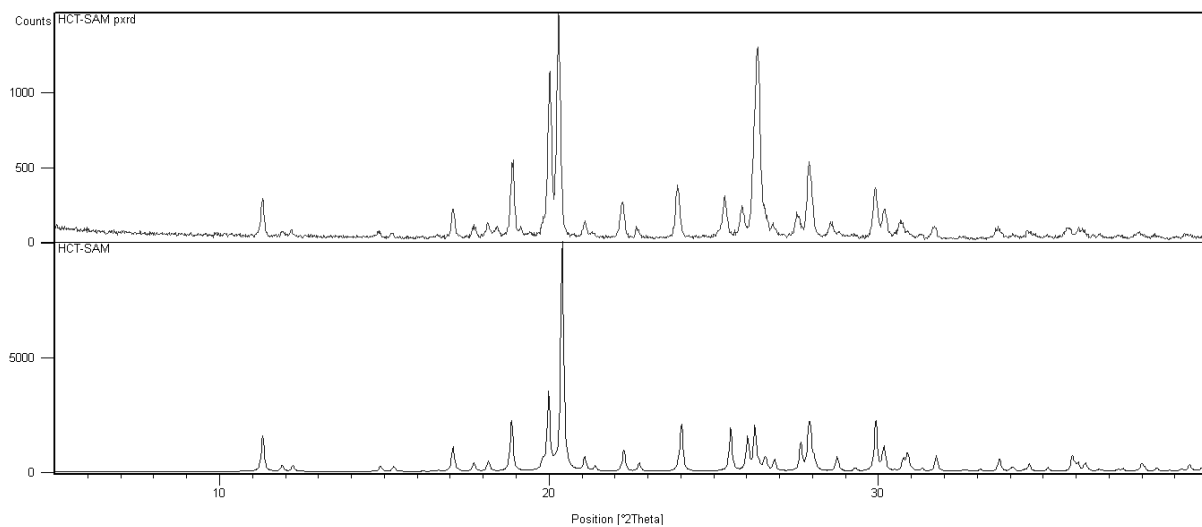

(c) HCT-SAM (1:0.5)

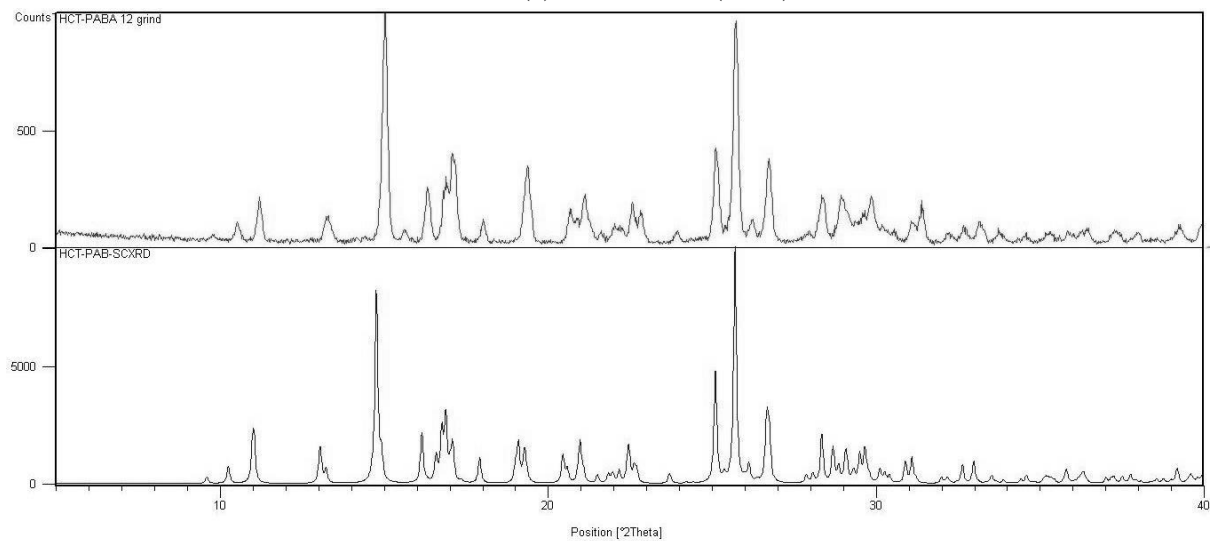

(d) HCT-PABA (1:2)

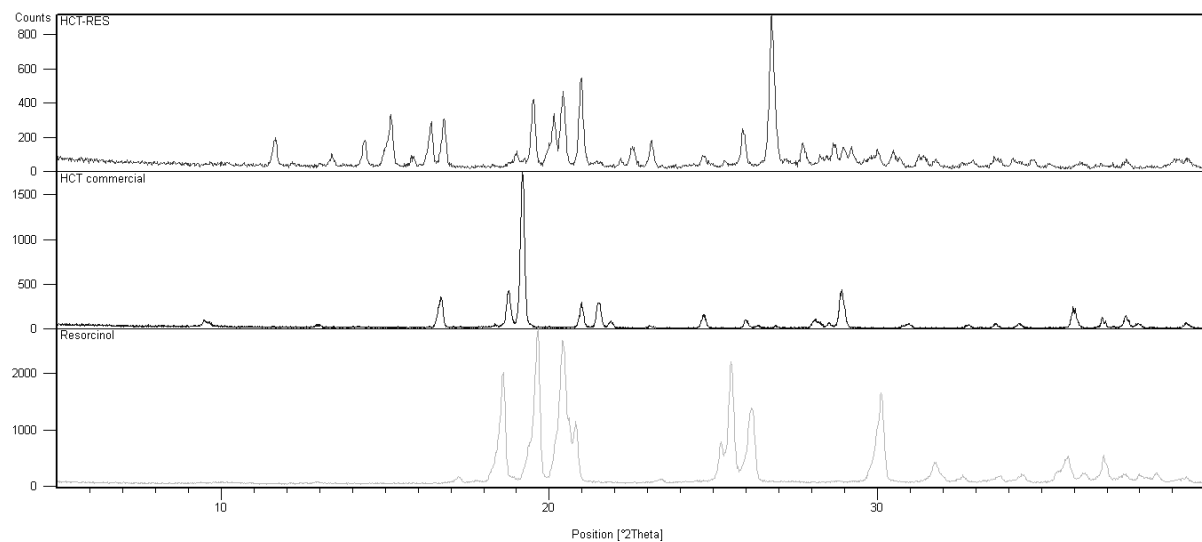

(e) HCT-RES (1:1)

**Figure S1.** PXRD (upper trace) comparison of HCT cocrystals (a-e) with the calculated X-ray lines of their crystal structures (lower trace) indicates bulk phase purity.

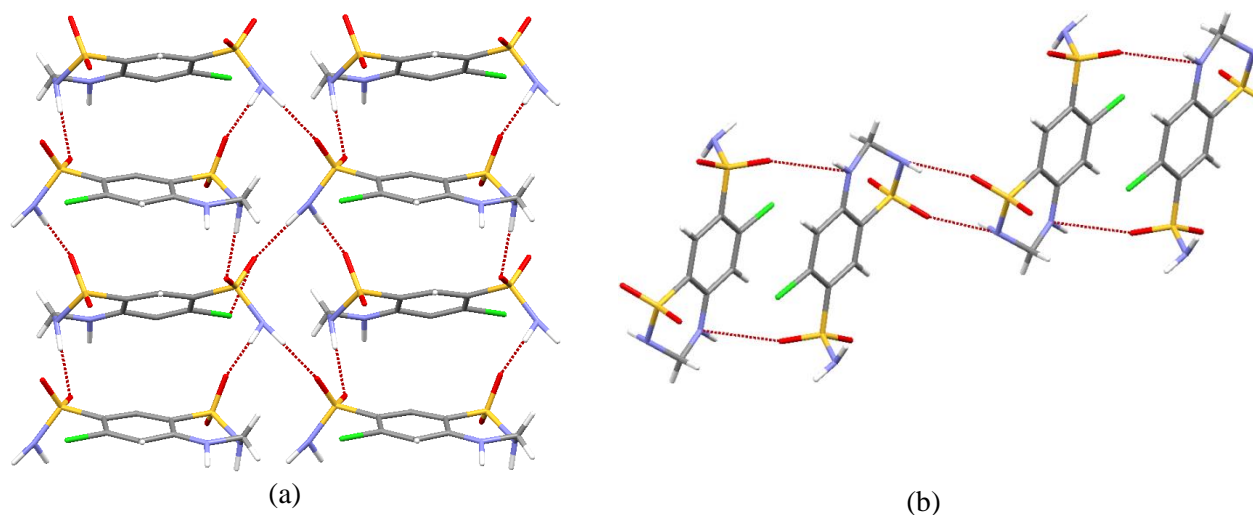

**Figure S2.** Crystal structure of reported HCT polymorphs (a) primary sulfonamide catemer chain motif in stable form I and (b) secondary sulfonamide dimer synthon in form II.

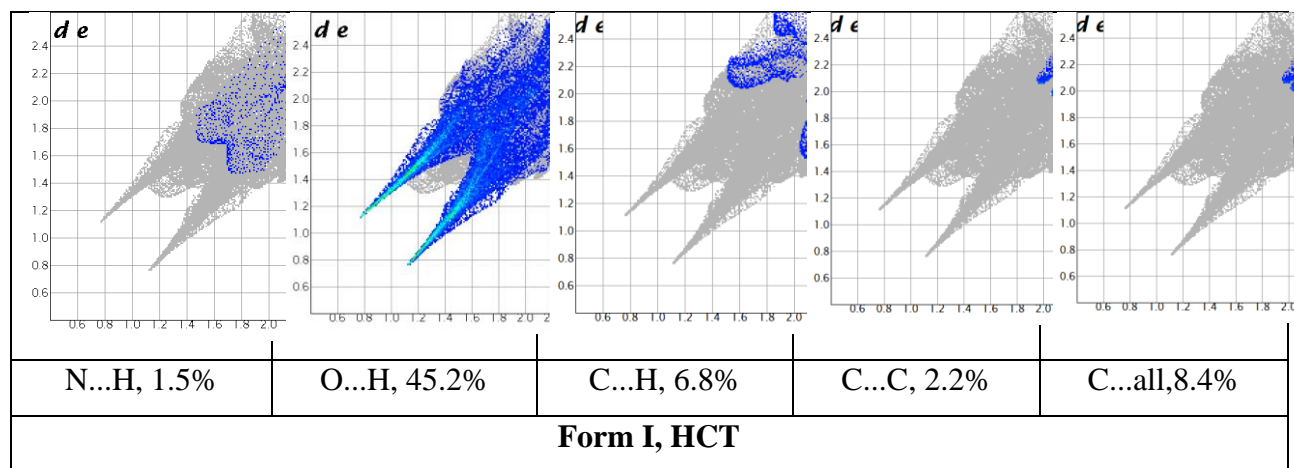



|                |              |             |             |                |
|----------------|--------------|-------------|-------------|----------------|
| N...H, 5.1%    | O...H, 41.4% | C...H, 8.0% | C...C, 4.1% | C...all, 10.7% |
| <b>HCT-SAM</b> |              |             |             |                |

**Figure S3.** Hirshfeld 2D finger print plots of the interactions present in HCT and co crystals

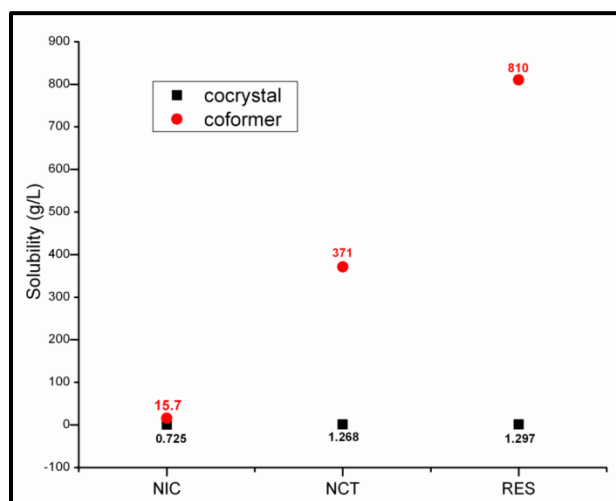

**Figure S4.** Plot of cocrystal and coformer solubility in pH 7.4 buffer

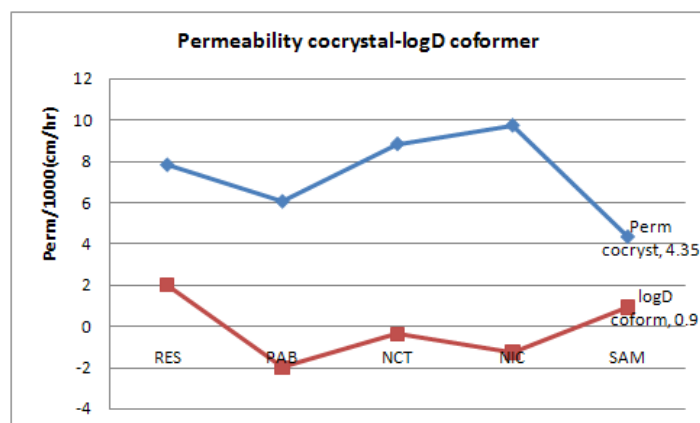

**Figure S5.** Plot of Permeability of cocrystal and logD coformer

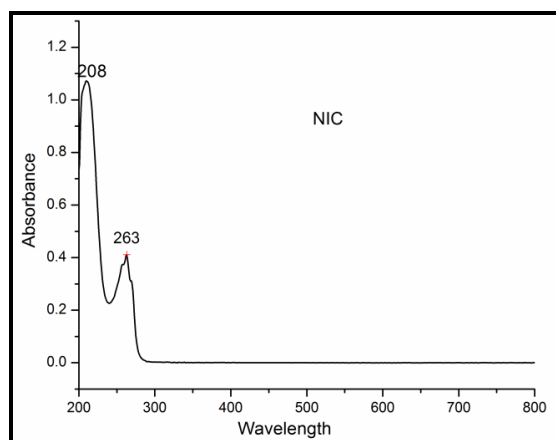

(a)

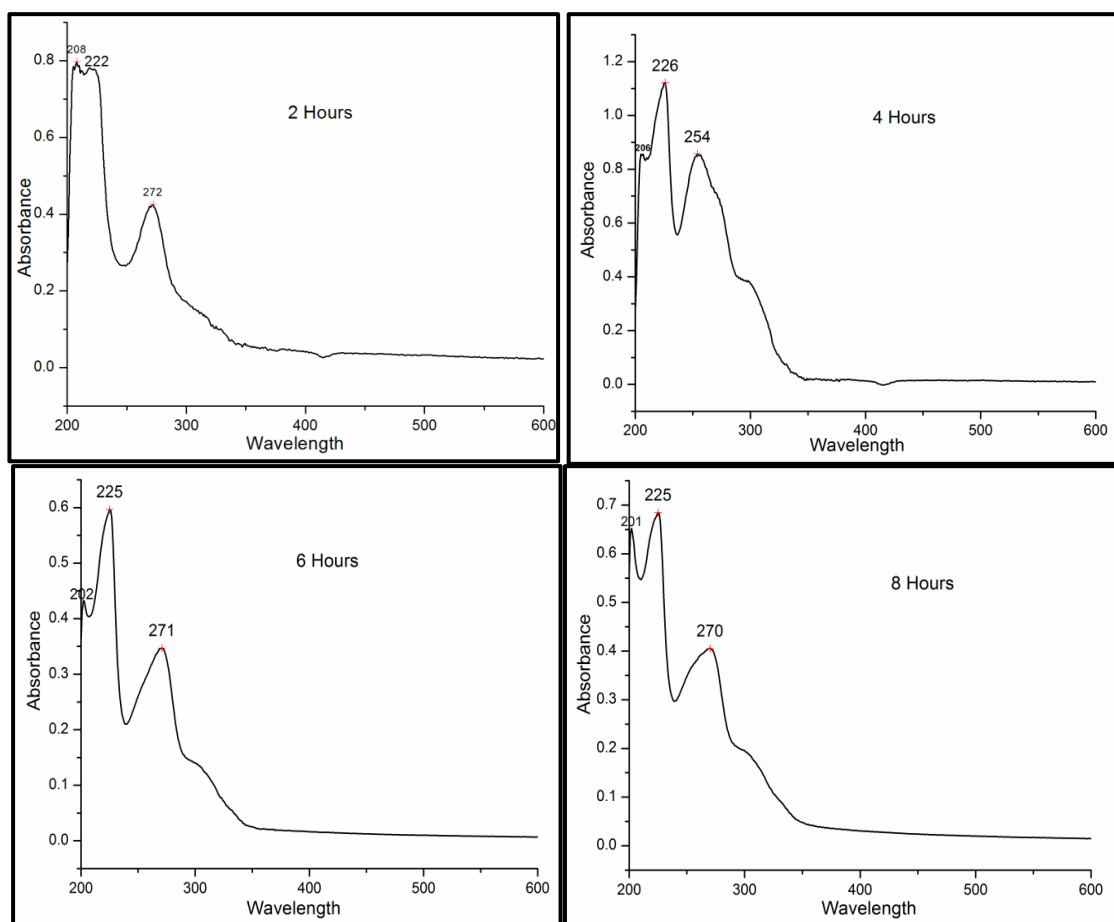

(b)

**Figure S6.** (a) UV absorbance spectra of NIC (b) UV absorbance spectra of HCT+ NIC physical mixture at different time intervals
